# Supplementary material for: Downregulation of Ribosomal Contents and Kinase Activities Is Associated with the Inhibitive Effect on the Growth of Group B Streptococcus Induced by Placental Extracellular Vesicles
Source: MDPI journal article supplement (doi:10.3390/biology10070664), 2021-07-14
Supplement: s1 [file s1]

A

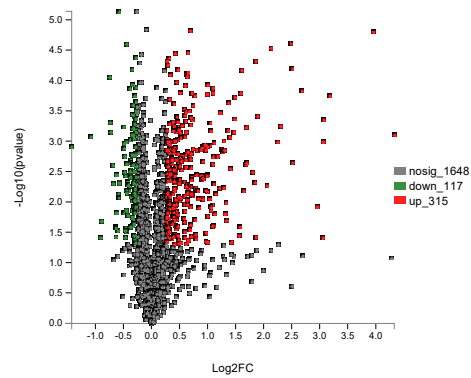

B

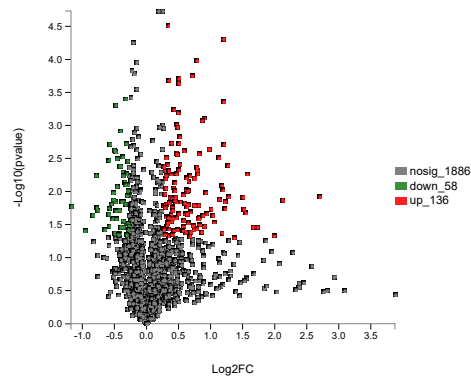

**Supplementary figure S1.** Summary of quantitative proteomic analysis of GBS treated with placental micro-EVs and nano-EVs. (A) A total of 432 out of 2080 proteins were found to be significantly upregulated/downregulated in placental micro-EVs treated samples compared with controls. (B) A total of 194 out of 2080 proteins were found to be significantly upregulated/downregulated in placental nano-EVs treated samples compared with controls. Proteins with fold changes of  $>1.20$  or  $<0.83$  relative to control and a two-tailed  $p$ -values lower than 0.05 were considered significantly upregulated or downregulated, respectively.

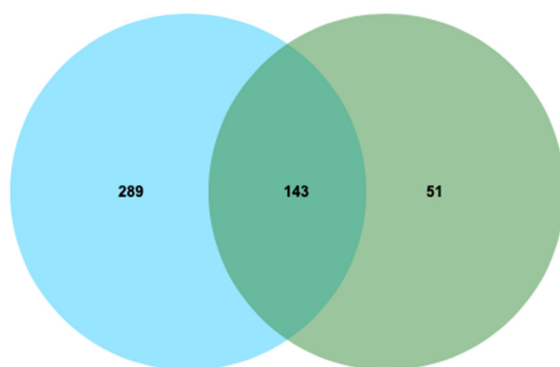

Figure S2. The Venn diagram showed that 143 overlapping proteins were sensitive to both placental micro- and nano-extracellular vesicles treatment. 289 proteins were only detected in GBS with placental micro-EVs treatment (blue circle), and 51 proteins were only found in GBS with placental nano-EVs treatment (green circle).

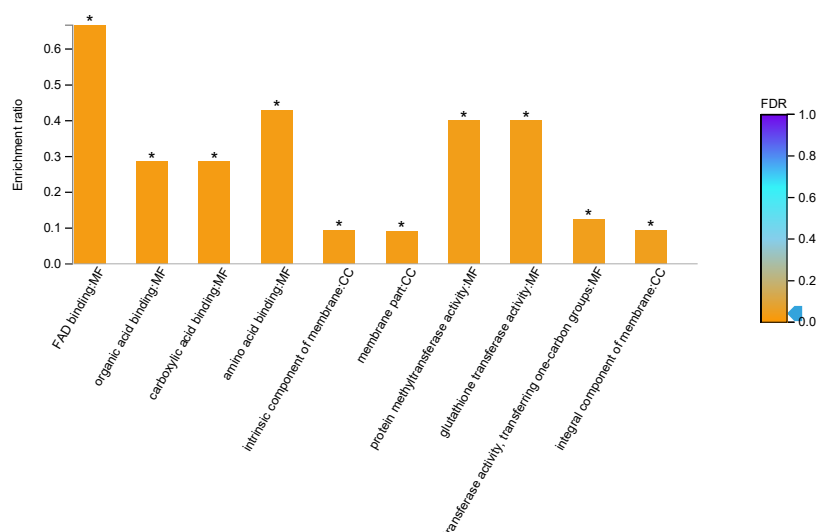

Figure S3. GO enrichment analysis of overlapping proteins

| Protein Number | GO ID      | GO Description                                       | GO Term | Le     | Ratio_in_st | Ratio_in_p | Pvalue_unc | Pvalue_corrected |
|----------------|------------|------------------------------------------------------|---------|--------|-------------|------------|------------|------------------|
| 2              | GO:0071949 | FAD binding                                          | MF      | 2/116  | 3/1804      | 0.011785   | 0.032409   |                  |
| 4              | GO:0043177 | organic acid binding                                 | MF      | 4/116  | 14/1804     | 0.009821   | 0.03241    |                  |
| 4              | GO:0031406 | carboxylic acid binding                              | MF      | 4/116  | 14/1804     | 0.009821   | 0.03241    |                  |
| 3              | GO:0016597 | amino acid binding                                   | MF      | 3/116  | 7/1804      | 0.007495   | 0.035334   |                  |
| 39             | GO:0031224 | intrinsic component of membrane                      | CC      | 39/116 | 413/1804    | 0.006      | 0.039603   |                  |
| 41             | GO:0044425 | membrane part                                        | CC      | 41/116 | 443/1804    | 0.007218   | 0.039698   |                  |
| 2              | GO:0008276 | protein methyltransferase activity                   | MF      | 2/116  | 5/1804      | 0.036064   | 0.042504   |                  |
| 2              | GO:0004364 | glutathione transferase activity                     | MF      | 2/116  | 5/1804      | 0.036064   | 0.042504   |                  |
| 9              | GO:0016741 | transferase activity, transferring one-carbon groups | MF      | 9/116  | 72/1804     | 0.045237   | 0.048155   |                  |
| 39             | GO:0016021 | integral component of membrane                       | CC      | 39/116 | 412/1804    | 0.005893   | 0.048613   |                  |

| Accession                                           | Regulation | Functional Description                                                   |
|-----------------------------------------------------|------------|--------------------------------------------------------------------------|
| FAD/organic acid/carboxylic acid/amino acid binding |            |                                                                          |
| AOA380J025                                          | up         | UDP-N-acetylenolpyruvoylglucosamine reductase                            |
| S9BK9                                               | up         | UDP-N-acetylenolpyruvoylglucosamine reductase                            |
| AOAG22C45                                           | down       | Arginine repressor, transcription factor activity                        |
| AOA0H125K9                                          | down       | Ornithine carbamoyltransferase , arginine catabolic process to ornithine |
| AOA656FZZ3                                          | up         | Aspartate carbamoyltransferase                                           |
| B2NHM1                                              | up         | Penicillin-binding protein 2x                                            |
| Transferase                                         |            |                                                                          |
| AOA0E1EN12                                          | up         | Fe-S-oxidoreductase                                                      |
| AOAG22569                                           | up         | Glutathione S-transferase, omega                                         |
| AOA0H125K9                                          | down       | Ornithine carbamoyltransferase                                           |
| AOA4U3JA57                                          | up         | Cytosine-specific methyltransferase                                      |
| AOA5N0LJY8                                          | up         | RNA methyltransferase                                                    |
| AOA656FZZ3                                          | up         | Aspartate carbamoyltransferase                                           |
| Q8E1T6                                              | down       | Uncharacterized protein                                                  |
| Q8E4H7                                              | up         | tRNA (guanine-N(1)-)-methyltransferase                                   |
| S8FQZ0                                              | up         | GST C-terminal domain-containing protein                                 |
| V6Z143                                              | up         | Ribosomal protein L11 methyltransferase                                  |
| V6Z397                                              | up         | rRNA methyltransferase                                                   |
| Intrinsic/integral component of membrane            |            |                                                                          |
| AOA076YYX7                                          | up         | Uncharacterized protein                                                  |
| AOA0E1EGN1                                          | up         | ABC transporter permease                                                 |
| AOA0E1EJX5                                          | up         | Membrane protein, putative                                               |
| AOA0E1EQI0                                          | up         | Conjugal transfer protein                                                |
| AOA0G2Y244                                          | down       | Putative zinc transport system permease protein AdcB                     |
| AOA0G22171                                          | down       | Putative deoxyribose-specific ABC transporter, permease protein          |
| AOA0G222W6                                          | down       | Cell surface hydrolase (Putative)                                        |
| AOA0G223U2                                          | up         | Two-component sensor histidine kinase, malate                            |
| AOA0H1DGL2                                          | up         | CIC family H(+)/Cl(-) exchange transporter                               |
| AOA0H1GGJ2                                          | up         | DUF1310 domain-containing protein                                        |
| AOA0H1L4V8                                          | down       | PTS beta-glucoside transporter subunit IIBC                              |
| AOA0H1QEN8                                          | down       | PTS ascorbate transporter subunit IIC                                    |
| AOA1A9E314                                          | up         | Cytochrome C oxidase assembly protein                                    |
| AOA380IUI7                                          | down       | Phage infection protein                                                  |
| AOA380IJ26                                          | up         | Quinolone resistance protein NorA                                        |
| AOA380IM47                                          | up         | Pullulanase                                                              |
| AOA3D8VX54                                          | up         | PTS galactitol transporter subunit IIC                                   |
| AOA3P1B8D9                                          | down       | DUF4366 domain-containing protein                                        |
| AOA656G179                                          | down       | PTS system sucrose-specific IIBC component                               |
| AOA6A4TPK7                                          | up         | ABC transporter permease subunit                                         |
| B2NHM1                                              | up         | Penicillin-binding protein 2X                                            |
| B9UQA9                                              | up         | PI-1 ancillary protein 2                                                 |
| Q8E1T6                                              | down       | Uncharacterized protein                                                  |
| Q8E3L7                                              | up         | Uncharacterized protein                                                  |
| Q8E452                                              | up         | MFS domain-containing protein                                            |
| Q8E5T8                                              | down       | Uncharacterized protein                                                  |
| Q8E714                                              | down       | Acyl_transf_3 domain-containing protein                                  |
| R4Z8N4                                              | down       | Membrane protein                                                         |
| S4WCS4                                              | up         | Uncharacterized protein                                                  |
| S8FJZ6                                              | up         | Membrane protein                                                         |
| S8GHL0                                              | up         | Cytochrome D ubiquinol oxidase subunit I                                 |
| S8GJD9                                              | up         | Uncharacterized protein                                                  |
| S8H257                                              | up         | Conjugal transfer protein TraG                                           |
| S9AP88                                              | up         | Teicoplanin resistance protein VanZ                                      |
| S9B205                                              | down       | Colicin V production protein                                             |
| V6Z0I7                                              | up         | Uncharacterized protein                                                  |
| V6Z0S3                                              | down       | Ribose ABC transporter permease                                          |
| V6Z3L9                                              | up         | Sodium:hydrogen antiporter                                               |
| V6Z3U1                                              | down       | Membrane protein                                                         |
| V6Z4Z9                                              | up         | ABC transporter substrate-binding protein                                |
| AOA0H1WTH4                                          | down       | Amino acid ABC transporter permease                                      |

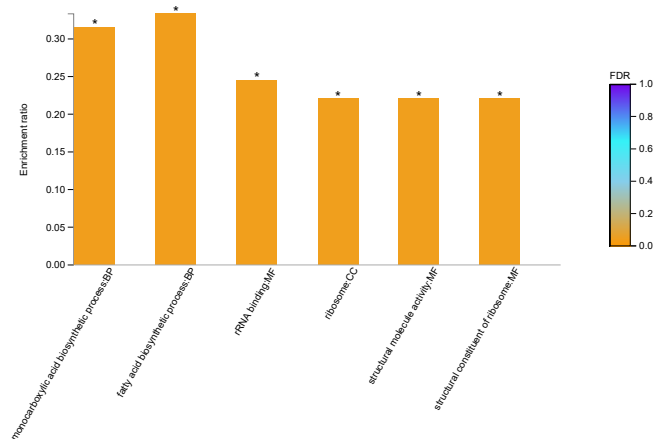

Figure S4. GO enrichment analysis of proteins only detected in GBS with placental micro-EVs treatment

| Protein Number | GO ID      | GO Description                     | GO Term(Level1) | Pvalue_corrected |
|----------------|------------|------------------------------------|-----------------|------------------|
| 6              | GO:0006633 | fatty acid biosynthetic process    | BP              | 0.047066015      |
| 6              | GO:0072330 | monocarboxylic acid biosynthetic   | BP              | 0.046917581      |
| 15             | GO:0005840 | ribosome                           | CC              | 0.049792414      |
| 13             | GO:0019843 | rRNA binding                       | MF              | 0.048303332      |
| 15             | GO:0005198 | structural molecule activity       | MF              | 0.049792414      |
| 15             | GO:0003735 | structural constituent of ribosome | MF              | 0.049792414      |

| Protein Accession | Regulation | Functional Description                                    |
|-------------------|------------|-----------------------------------------------------------|
| V6Z6Z4            | down       | Uncharacterized protein                                   |
| S8FH53            | up         | Biotin carboxyl carrier protein of acetyl-CoA carboxylase |
| Q8E3E6            | down       | 30S ribosomal protein S7                                  |
| S8FKP1            | up         | 30S ribosomal protein S15                                 |
| A0A5N0R7P5        | up         | Ribonuclease M5                                           |
| S9B2D4            | up         | 3-oxoacyl-[acyl-carrier-protein] synthase 2               |
| A0A656G1D0        | up         | 4'-phosphopantetheinyl transferase5                       |
| V6Y280            | down       | 30S ribosomal protein S13                                 |
| A0A0G9JYE8        | up         | 3-oxoacyl-[acyl-carrier-protein] synthase 2               |
| V6Z275            | down       | S1 RNA-binding protein                                    |
| Q3K0C9            | down       | 50S ribosomal protein L35                                 |
| V6Z128            | down       | 30S ribosomal protein S9                                  |
| R4Z934            | down       | 30S ribosomal protein S11                                 |
| A0A1C0BEJ0        | down       | 50S ribosomal protein L21                                 |
| Q8DYG1            | down       | 50S ribosomal protein L11                                 |
| S9C983            | up         | 50S ribosomal protein L23                                 |
| A0A6A4TZH8        | down       | 50S ribosomal protein L3                                  |
| Q8DZZ2            | down       | 30S ribosomal protein S20                                 |
| V6Y247            | down       | 50S ribosomal protein L3                                  |
| V6Z0L9            | down       | 50S ribosomal protein L10                                 |
| V6Z1H0            | down       | Biotin carboxyl carrier protein of acetyl-CoA carboxylase |
| V6Z135            | down       | 30S ribosomal protein S11                                 |
| V6Z2C6            | down       | 50S ribosomal protein L7/L12                              |
| Q8E5S2            | up         | Uncharacterized protein                                   |

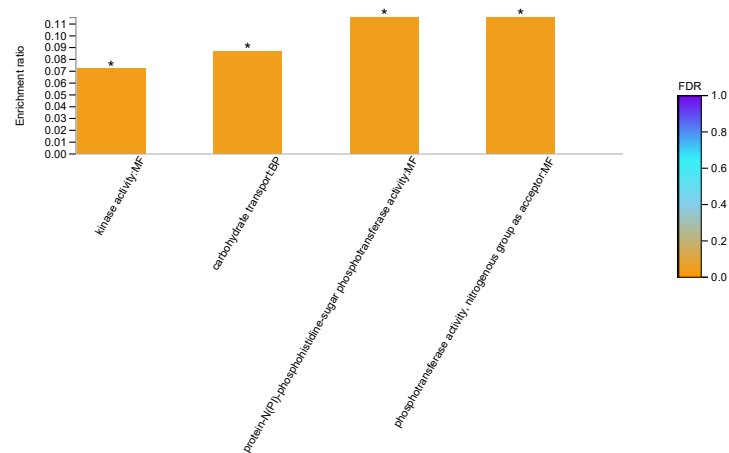

Figure S5. GO enrichment analysis of proteins only detected in GBS with placental nano-EVs treatment

| Protein Number | GO ID      | GO Description                                                  | GO Term(Level1) | Pvalue_corrected |
|----------------|------------|-----------------------------------------------------------------|-----------------|------------------|
| 4              | GO:0008643 | carbohydrate transport                                          | BP              | 0.048242083      |
| 9              | GO:0016301 | kinase activity                                                 | MF              | 0.044508353      |
| 3              | GO:0008982 | protein-N(P)-phosphohistidine-sugar phosphotransferase activity | MF              | 0.049870836      |
| 3              | GO:0016775 | phosphotransferase activity, nitrogenous group as acceptor      | MF              | 0.049870836      |

| Protein Accession | Regulation | Functional Description                                                                                                                 |
|-------------------|------------|----------------------------------------------------------------------------------------------------------------------------------------|
| A0A0H1NG81        | down       | Putative galactitol operon regulator (Transcriptional antiterminator), BglG family PTS system, mannitolfructose-specific IIA component |
| V6Z7B9            | down       | Lipid kinase                                                                                                                           |
| Q8E2P0            | down       | Uncharacterized protein                                                                                                                |
| A0A0H1U8Y4        | down       | Glycerol kinase                                                                                                                        |
| P65204            | down       | Adenylate kinase                                                                                                                       |
| S9B0Q5            | down       | PTS galactitol transporter subunit IIC                                                                                                 |
| V6Z5I1            | up         | PTS mannose transporter subunit IIAB                                                                                                   |
| A0A380IM67        | up         | Two-component sensor histidine kinase                                                                                                  |
| A0A380IY32        | down       | PTS system, sucrose-specific IIB component / PTS system, sucrose-specific IIC component / PTS system, sucrose-specific IIA component   |
| Q8DX04            | down       | Sensor histidine kinase                                                                                                                |
| V6Z3K8            | down       | Thymidylate kinase                                                                                                                     |
